# Supplementary material
Source: Springer Nature journal article supplement (https://www.springermedizin.de/resource/supplementary/12888_2012_1032_MOESM1_ESM.pdf/9479150)
Supplement: MOESM1 [file 9479150]

Number of people on the  
dementia register (n=1051)

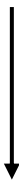

Number of people on the  
dementia register receiving low-  
dose anti-psychotics (n=161)

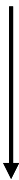

Number of people on the  
dementia register receiving low-  
dose anti-psychotics initiated by  
primary care (n=70)

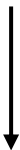

Number of people in whom the  
anti-psychotic was withdrawn or  
the dosage reduced (n=43)
